# Supplementary material
Source: MDPI journal article supplement (https://www.mdpi.com/2304-6767/11/6/149)
Supplement: s1 [file s1]

**Supplementary Table S1. a-b-c-d-e-f-g** Inhibition halos measures (4 disks per plate, 9 plates, 7 repetitions). for, ACTIVA™ BioActive-Restorative™(Pulpdent®) and for KETAC™ Silver (3M™)

a) Test 1 – First repetition

| Test 1-1 |       | Test 1-2 |       | Test 1-3 |       |
|----------|-------|----------|-------|----------|-------|
| Activa   | Ketac | Activa   | Ketac | Activa   | Ketac |
| 6,5      | 12    | 7,5      | 13    | 6,5      | 7,5   |
| 7        | 8     | 7        | 9,5   | 7        | 7,5   |
| 9,5      | 8,5   | 7,5      | 7,5   | 8,5      | 6     |
| 10       | 6,5   | 7        | 8     | 8        | 9     |

  

| Test 1-4 |       | Test 1-5 |       | Test 1-6 |       |
|----------|-------|----------|-------|----------|-------|
| Activa   | Ketac | Activa   | Ketac | Activa   | Ketac |
| 9        | 10    | 7        | 8     | 9        | 7,5   |
| 9        | 7     | 6,5      | 8,5   | 6        | 8,5   |
| 8        | 8,5   | 8        | 11    | 7        | 9     |
| 7,5      | 11    | 6,5      | 7     | 7,5      | 9     |

  

| Test 1-7 |       | Test 1-8 |       | Test 1-9 |       |
|----------|-------|----------|-------|----------|-------|
| Activa   | Ketac | Activa   | Ketac | Activa   | Ketac |
| 6,5      | 10    | 10,5     | 12    | 8        | 13    |
| 7        | 9     | 10       | 9     | 8        | 7,5   |
| 7,5      | 8     | 7        | 8,5   | 7        | 7,5   |
| 7,5      | 8,5   | 7,5      | 7     | 7        | 8     |

b) Test 2 – Second repetition

Test 2-1

| Activa | Ketac |
|--------|-------|
| 7      | 10    |
| 7      | 7     |
| 9      | 8,5   |
| 8,5    | 6     |

Test 2-2

| Activa | Ketac |
|--------|-------|
| 9      | 9     |
| 6      | 8,5   |
| 6,5    | 7     |
| 7      | 10    |

Test 2-3

| Activa | Ketac |
|--------|-------|
| 6      | 6,5   |
| 6,5    | 6,5   |
| 8,5    | 7     |
| 9      | 8     |

Test 2-4

| Activa | Ketac |
|--------|-------|
| 7,5    | 9     |
| 7      | 9     |
| 9      | 8,5   |
| 6      | 6     |

Test 2-5

| Activa | Ketac |
|--------|-------|
| 8,5    | 6,5   |
| 9      | 13    |
| 8      | 12    |
| 7      | 10,5  |

Test 2-6

| Activa | Ketac |
|--------|-------|
| 8,5    | 10    |
| 8      | 9     |
| 7      | 6     |
| 9      | 11    |

Test 2-7

| Activa | Ketac |
|--------|-------|
| 6      | 8     |
| 8      | 7,5   |
| 8      | 9     |
| 8      | 7,5   |

Test 2-8

| Activa | Ketac |
|--------|-------|
| 9      | 10    |
| 7,5    | 8     |
| 8      | 9     |
| 8,5    | 8     |

Test 2-9

| Activa | Ketac |
|--------|-------|
| 6,5    | 8     |
| 10     | 9     |
| 8,5    | 6,5   |
| 8      | 7     |

c) Test 3 – Third repetition

d) Test 4 – Fourth repetition

Test 4-1

| Activa | Ketac |
|--------|-------|
| 6,5    | 8,5   |
| 7      | 10    |
| 7,5    | 9,5   |
| 8      | 10,5  |

Test 4-2

| Activa | Ketac |
|--------|-------|
| 8,5    | 7,5   |
| 8,5    | 9     |
| 8      | 9,5   |
| 8      | 9     |

Test 4-3

| Activa | Ketac |
|--------|-------|
| 7,5    | 8     |
| 7      | 8,5   |
| 9,5    | 9,5   |
| 8,5    | 9     |

Test 4-4

| Activa | Ketac |
|--------|-------|
| 7,5    | 11,5  |
| 6,5    | 8,5   |
| 7      | 9     |
| 7      | 9     |

Test 4-5

| Activa | Ketac |
|--------|-------|
| 7      | 9     |
| 8      | 8,5   |
| 9      | 8     |
| 9,5    | 8,5   |

Test 4-6

| Activa | Ketac |
|--------|-------|
| 8      | 8     |
| 8      | 9     |
| 8,5    | 9,5   |
| 9      | 8,5   |

Test 4-7

| Activa | Ketac |
|--------|-------|
| 8,5    | 10,5  |
| 9      | 10,5  |
| 8      | 9,5   |
| 10     | 9,5   |

Test 4-8

| Activa | Ketac |
|--------|-------|
| 7,5    | 9,5   |
| 7      | 8,5   |
| 7,5    | 7,5   |
| 9      | 9     |

Test 4-9

| Activa | Ketac |
|--------|-------|
| 10     | 7     |
| 6      | 8     |
| 11     | 8     |
| 9,5    | 7     |

## e) Test 5 – Fifth repetition

Test 5-1

| Activa | Ketac |
|--------|-------|
| 11     | 7,5   |
| 9,5    | 8     |
| 10     | 9     |
| 9      | 11    |

Test 5-2

| Activa | Ketac |
|--------|-------|
| 7      | 8,5   |
| 10     | 8     |
| 8,5    | 9,5   |
| 9      | 9,5   |

Test 5-3

| Activa | Ketac |
|--------|-------|
| 8,5    | 9     |
| 9      | 9     |
| 7      | 7     |
| 7,5    | 8,5   |

Test 5-4

| Activa | Ketac |
|--------|-------|
| 8,5    | 6,5   |
| 8      | 7     |
| 7,5    | 8,5   |
| 7,5    | 8     |

Test 5-5

| Activa | Ketac |
|--------|-------|
| 7      | 7,5   |
| 8,5    | 7,5   |
| 8      | 7     |
| 9      | 7,5   |

Test 5-6

| Activa | Ketac |
|--------|-------|
| 9      | 8,5   |
| 8,5    | 8     |
| 7,5    | 7,5   |
| 8      | 8     |

Test 5-7

| Activa | Ketac |
|--------|-------|
| 7,5    | 8,5   |
| 7      | 8     |
| 9      | 8,5   |
| 9,5    | 8     |

Test 5-8

| Activa | Ketac |
|--------|-------|
| 9      | 7,5   |
| 8      | 7     |
| 9,5    | 8,5   |
| 8,5    | 8     |

Test 5-9

| Activa | Ketac |
|--------|-------|
| 8,5    | 9     |
| 9      | 8,5   |
| 9,5    | 8,5   |
| 8,5    | 7,5   |

## f) Test 6 – Sixth repetition

Test 6-1

| Activa | Ketac |
|--------|-------|
| 8      | 8,5   |
| 8,5    | 9,5   |
| 9      | 10    |
| 9,5    | 7,5   |

Test 6-2

| Activa | Ketac |
|--------|-------|
| 8      | 8,5   |
| 9,5    | 8,5   |
| 9      | 7,5   |
| 8,5    | 7,5   |

Test 6-3

| Activa | Ketac |
|--------|-------|
| 7,5    | 8,5   |
| 7,5    | 8     |
| 8,5    | 8     |
| 8,5    | 9     |

Test 6-4

| Activa | Ketac |
|--------|-------|
| 9      | 7     |
| 8      | 8     |
| 7      | 7     |
| 8      | 7,5   |

Test 6-5

| Activa | Ketac |
|--------|-------|
| 8,5    | 8     |
| 7      | 8     |
| 7,5    | 8,5   |
| 7,5    | 7     |

Test 6-6

| Activa | Ketac |
|--------|-------|
| 7,5    | 9     |
| 7      | 7,5   |
| 8,5    | 7,5   |
| 7      | 8,5   |

Test 6-7

| Activa | Ketac |
|--------|-------|
| 8      | 9     |
| 8,5    | 7     |
| 7      | 7     |
| 8      | 7     |

Test 6-8

| Activa | Ketac |
|--------|-------|
| 8      | 8     |
| 7,5    | 8     |
| 8,5    | 8     |
| 8      | 8,5   |

Test 6-9

| Activa | Ketac |
|--------|-------|
| 7,5    | 8,5   |
| 7      | 7     |
| 8      | 7     |
| 8      | 8,5   |

## g) Test 7– Seventh repetition

Test 7-1

| Activa | Ketac |
|--------|-------|
| 7      | 8,5   |
| 6,5    | 8     |
| 8,5    | 8     |
| 9      | 8     |

Test 7-2

| Activa | Ketac |
|--------|-------|
| 8      | 9     |
| 8      | 8     |
| 8,5    | 7     |
| 8      | 8     |

Test 7-3

| Activa | Ketac |
|--------|-------|
| 8,5    | 8     |
| 8      | 8     |
| 8      | 7,5   |
| 8,5    | 7,5   |

Test 7-4

| Activa | Ketac |
|--------|-------|
| 8      | 9,5   |
| 7,5    | 8     |
| 7,5    | 9     |
| 8      | 9,5   |

Test 7-5

| Activa | Ketac |
|--------|-------|
| 8      | 8     |
| 8,5    | 8     |
| 9      | 8     |
| 9      | 8,5   |

Test 7-6

| Activa | Ketac |
|--------|-------|
| 7      | 11    |
| 7,5    | 12    |
| 7      | 8     |
| 8      | 10    |

Test 7-7

| Activa | Ketac |
|--------|-------|
| 8      | 9     |
| 9      | 8     |
| 9      | 9     |
| 9      | 8     |

Test 7-8

| Activa | Ketac |
|--------|-------|
| 9      | 10    |
| 8,5    | 10    |
| 8      | 9     |
| 8      | 9     |

Test 7-9

| Activa | Ketac |
|--------|-------|
| 9      | 8,5   |
| 9,5    | 9     |
| 8      | 9,5   |
| 8,5    | 9     |
